# Supplementary material for: Novel thiosemicarbazone based sensors for transition metals
Source: Royal Society of Chemistry journal article supplement (doi:10.1039/d4sd00266k), 2024-01-01
Supplement: d4sd00266k1.pdf [file d4sd00266k1.pdf]

### Supplementary File

## A Novel Thiosemicarbazone based sensor for Transition metals

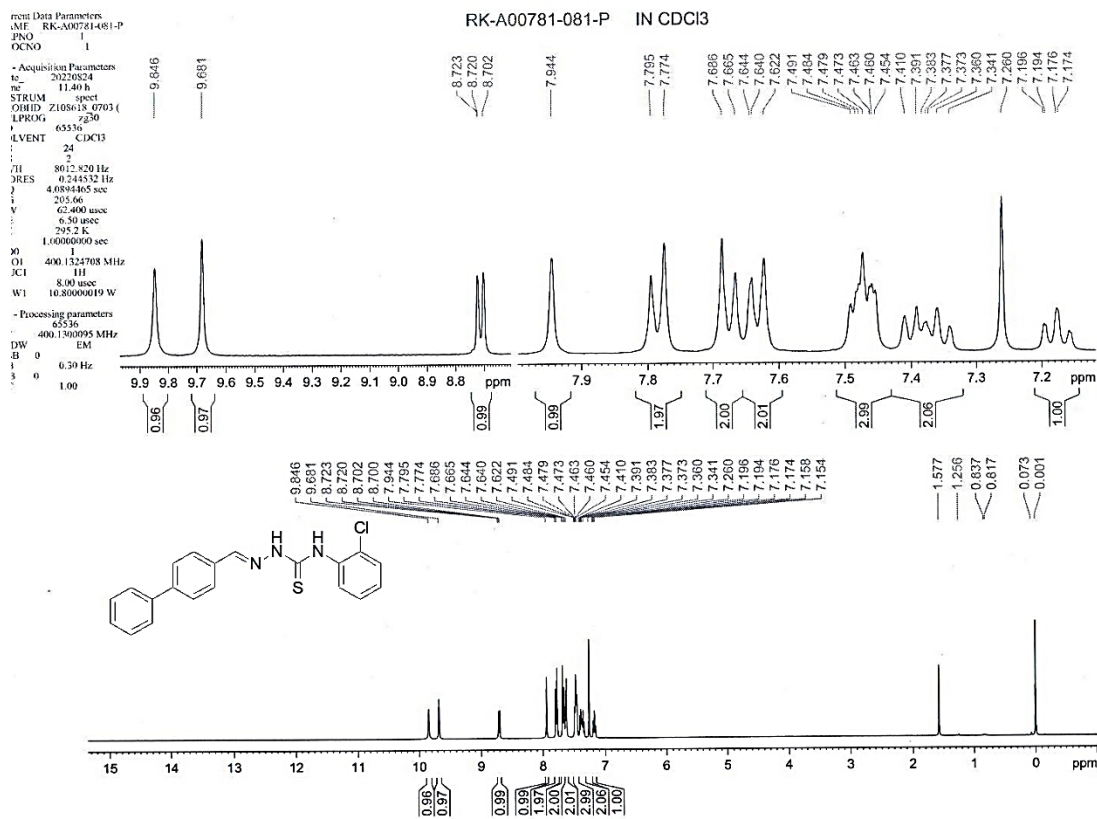

<sup>1</sup>H NMR of (E)-1-(4-phenylbenzylidene)-4-(2-chlorophenyl)thiosemicarbazide

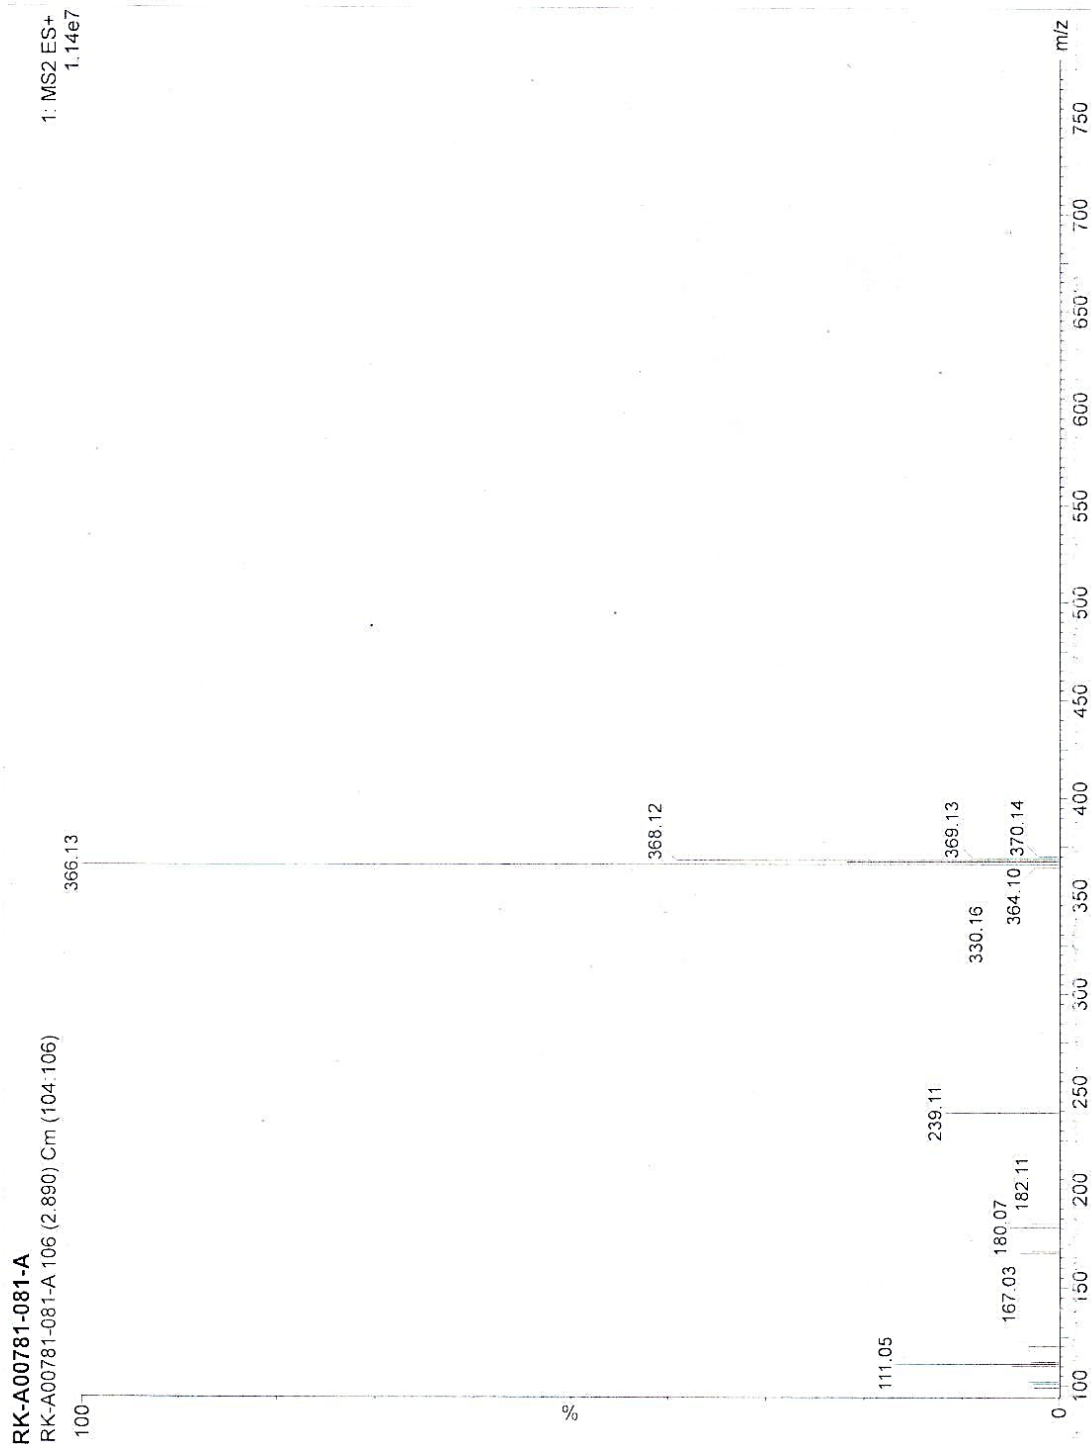

Mass Spectra of (E)-1-(4-phenylbenzylidene)-4-(2-chlorophenyl)thiosemicarbazide

XEVO-TQD#QCA1591

24-Aug-2022 11:55:27

RK-A00781-081-A.Sm (Mn, 2x3)

| Time | Height   | Area       | Area% |
|------|----------|------------|-------|
| 2.12 | 212871   | 5418.69    | 0.05  |
| 2.80 | 20790544 | 9977875.00 | 99.95 |

3: Diode Array

Range: 2.097e+2

Area

Area%

2.80

1.0e+2

0.0

-0.00

0.25

0.50

0.75

1.00

1.25

1.50

1.75

2.00

2.25

2.50

2.75

3.00

3.25

3.50

3.75

4.00

1.07

0.05

0.30

0.41

0.68

0.74

0.93

1.12

1.34

1.53

1.70

1.89

1.97

2.08

2.23

2.27

2.41

2.63

2.79

3.04

3.15

3.29

3.48

3.64

3.81

3.97

3.99

7.15e3

0.01

0.21

0.37

0.51

0.67

0.86

1.05

1.14

1.44

1.52

1.57

1.77

1.93

2.04

2.23

2.42

2.59

2.64

2.92

3.03

3.11

3.27

3.36

3.55

3.71

3.88

3.93

5.35e4

0.14

0.25

0.47

0.63

0.79

0.93

1.04

1.29

1.34

1.56

1.70

1.89

2.08

2.41

2.52

2.63

2.74

3.04

3.21

3.37

3.45

3.67

3.97

1.35e6

0.12

0.31

0.78

0.94

1.03

1.33

1.66

1.74

1.96

2.15

2.23

2.45

2.64

2.84

2.89

3.08

3.19

3.41

3.68

3.90

5.72e7

0.01

0.21

0.37

0.51

0.67

0.86

1.05

1.14

1.44

1.52

1.57

1.77

1.93

2.04

2.23

2.42

2.59

2.64

2.92

3.03

3.11

3.27

3.36

3.55

3.71

3.88

3.93

5.35e4

0.14

0.25

0.47

0.63

0.79

0.93

1.04

1.29

1.34

1.56

1.70

1.89

2.08

2.41

2.52

2.63

2.74

3.04

3.21

3.37

3.45

3.67

3.97

1.35e6

0.12

0.31

0.78

0.94

1.03

1.33

1.66

1.74

1.96

2.15

2.23

2.45

2.64

2.84

2.89

3.08

3.19

3.41

3.68

3.90

5.72e7

0.01

0.21

0.37

0.51

0.67

0.86

1.05

1.14

1.44

1.52

1.57

1.77

1.93

2.04

2.23

2.42

2.59

2.64

2.92

3.03

3.11

3.27

3.36

3.55

3.71

3.88

3.93

5.35e4

0.14

0.25

0.47

0.63

0.79

0.93

1.04

1.29

1.34

1.56

1.70

1.89

2.08

2.41

2.52

2.63

2.74

3.04

3.21

3.37

3.45

3.67

3.97

1.35e6

0.12

0.31

0.78

0.94

1.03

1.33

1.66

1.74

1.96

2.15

2.23

2.45

2.64

2.84

2.89

3.08

3.19

3.41

3.68

3.90

5.72e7

Mass Spectra of (E)-1-(4-phenylbenzylidene)-4-(2-chlorophenyl)thiosemicarbazide

Current Data Parameters  
 NAME RK-A00781-109  
 EXPNO 1  
 PROCNO 1  
 F2 - Acquisition Parameters  
 Date\_ 20220906  
 Time\_ 11:39 h  
 INSTRUM spect  
 RECIDID 2108618 0703 (C  
 PULPROG zg30  
 D 65536  
 SOLVENT CDCl3  
 NS 216  
 DS 2  
 SWH 8012.820 Hz  
 FIDRES 0.244532 Hz  
 AQ 4.0894465 sec  
 CG 205.66  
 JW 62.400 uscc  
 SE 6.50 uscc  
 TE 295.3 K  
 D1 1.0000009 sec  
 TD0 1  
 FID01 400.1324708 MHz  
 NUC1 1H  
 H 8.00 uscc  
 PLW1 10.80000019 W  
 F2 - Processing parameters  
 SI 65536  
 SF 400.1300095 MHz  
 AWDW 0  
 SSB 0  
 LB 0.30 Hz  
 GB 0  
 C 1.00

RK-A00781-109(INSOLUBLE) IN CDCl3

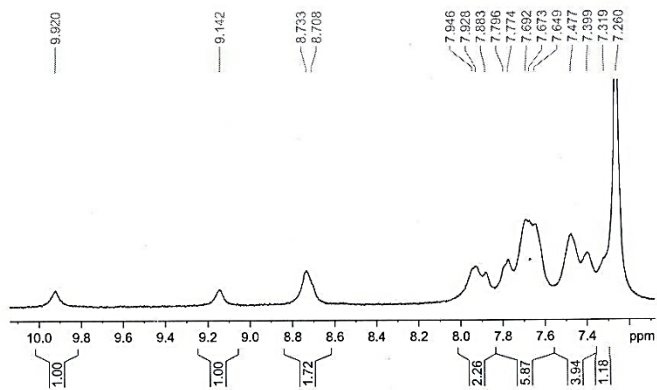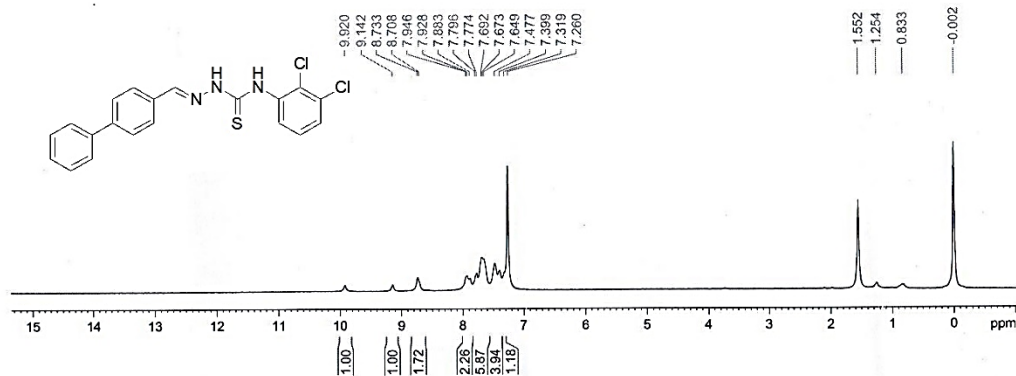

<sup>1</sup>H NMR Spectra of (E)-1-(4-phenylbenzylidene)-4-(2,3-dichlorophenyl)thiosemicarbazide





XEVO-TQD#QCA1591

06-Sep-2022 11:16:25  
 RK-A00781-109 Sm (Mn, 2x3)

3: Diode Array  
 Range: 1.206e+2

| Time | Height    | Area       | Area% |
|------|-----------|------------|-------|
| 3.00 | 548143    | 14253.33   | 0.30  |
| 3.36 | 3864442   | 130529.75  | 2.70  |
| 3.45 | 1162209   | 31038.20   | 0.64  |
| 3.65 | 118966152 | 4853251.50 | 96.36 |

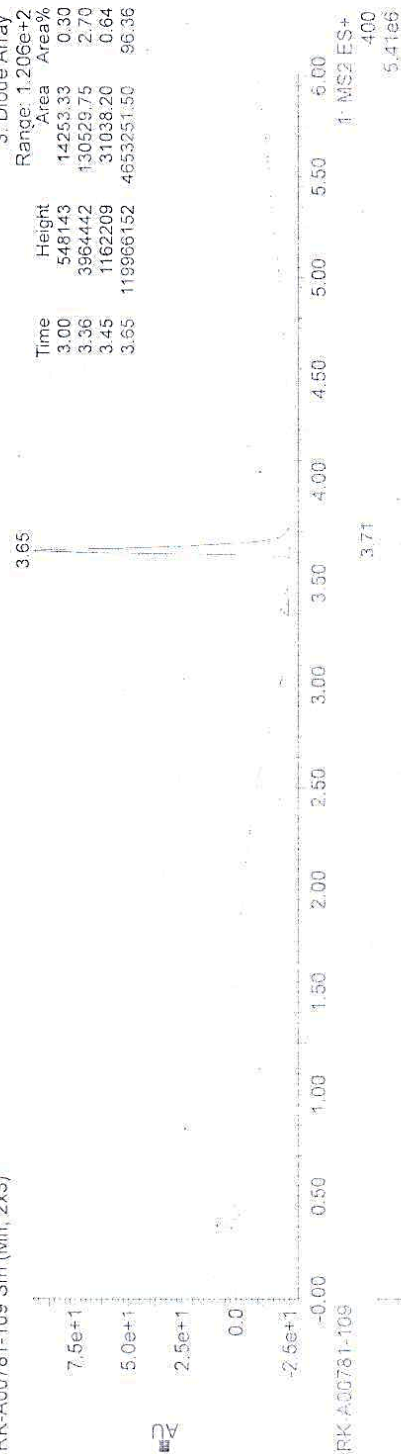

RK-A00781-109  
 1: MS2 ES+  
 400  
 5.41e6

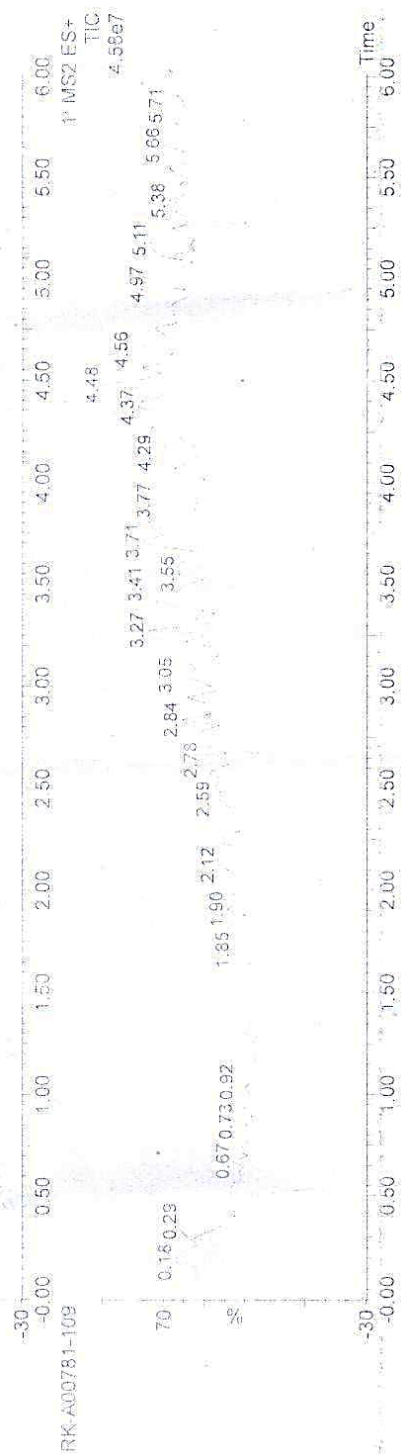

RK-A00781-109  
 1: MS2 ES+  
 TIC  
 4.58e7

Mass Spectra of (E)-1-(4-phenylbenzylidene)-4-(2,3-dichlorophenyl)thiosemicarbazide

Current Data Parameters  
 NAME RK-A00781-107  
 EXPNO 1  
 PROCNO 1  
 F2 - Acquisition Parameters  
 Date\_ 20220906  
 Time 11:18 h  
 INSTRUM spect  
 PROBHD Z108618-0703 C  
 PULPROG zg30  
 TD 65536  
 SOLVENT CDCl3  
 NS 289  
 DS 2  
 SWH 9612.820 Hz  
 FIDRES 0.244532 Hz  
 AQ 4.0394465 sec  
 RG 205.66  
 DW 62.400 usec  
 DE 6.50 usec  
 TE 295.5 K  
 D1 1.0000000 sec  
 TD0 400.1324708 MHz  
 SFO1 400.1324708 MHz  
 NUC1 1H  
 PI 8.00 usec  
 PLW1 10.80000019 W

RK-A00781-107 IN CDCl3

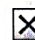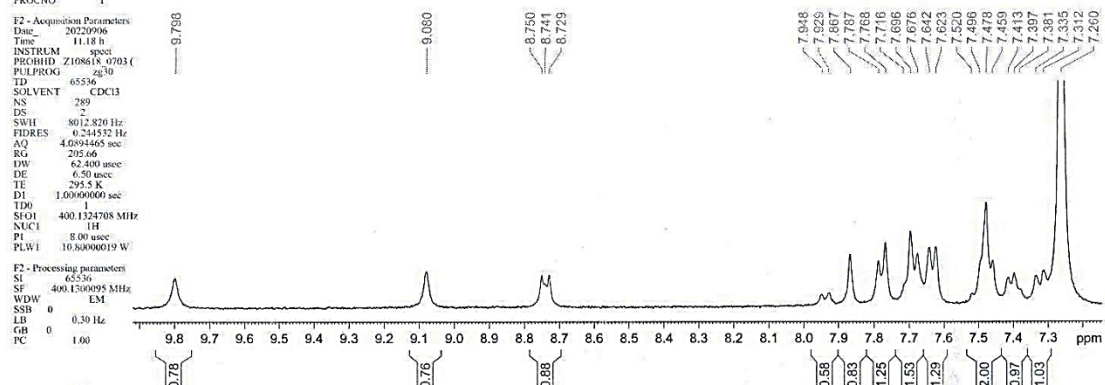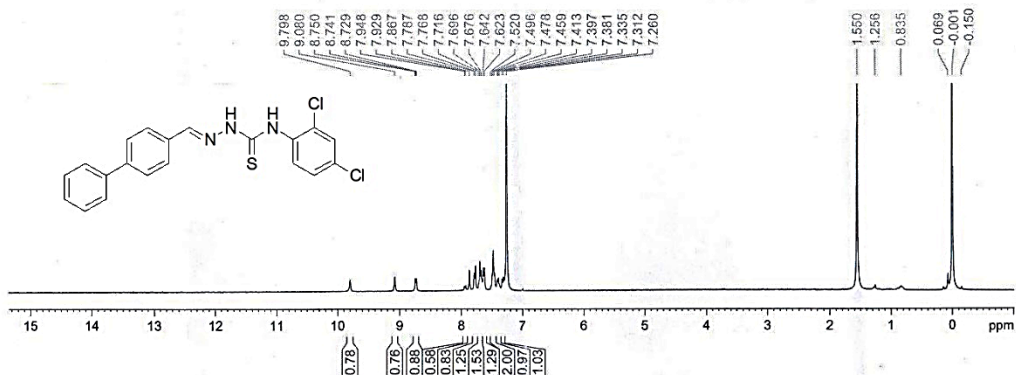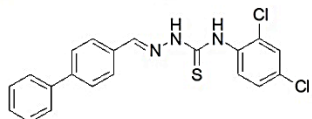

<sup>1</sup>H NMR Spectra of (E)-1-(4-phenylbenzylidene)-4-(2,4-dichlorophenyl)thiosemicarbazide



RK-A00781-107

RK-A00781-107- 140 (3.822) Cm (139-140-104-137)

1. MS2 ES+  
5.36e6

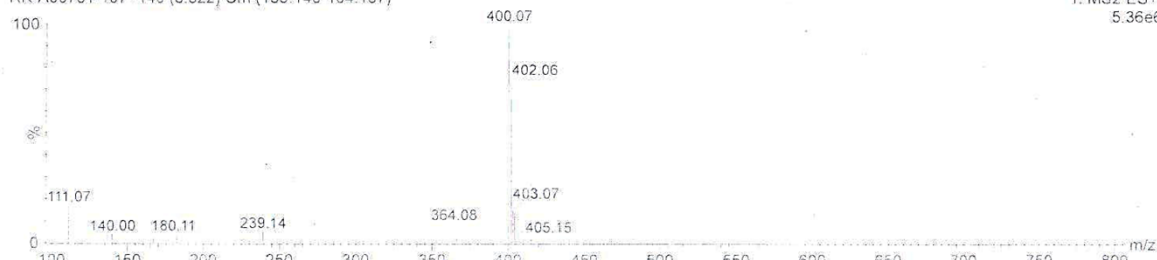

RK-A00781-107- 129 (3.520) Cm (128-129-89-126)

1. MS2 ES+  
4.42e6

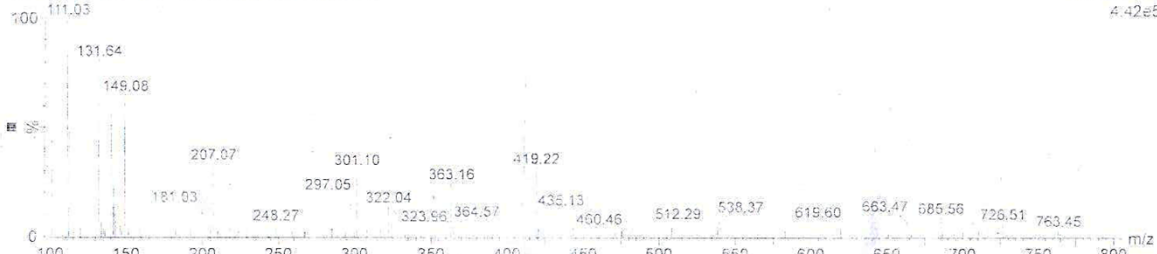

RK-A00781-107- 92 (2.506) Cm (91-92-(76-89+102-139))

1. MS2 ES+  
1.46e7

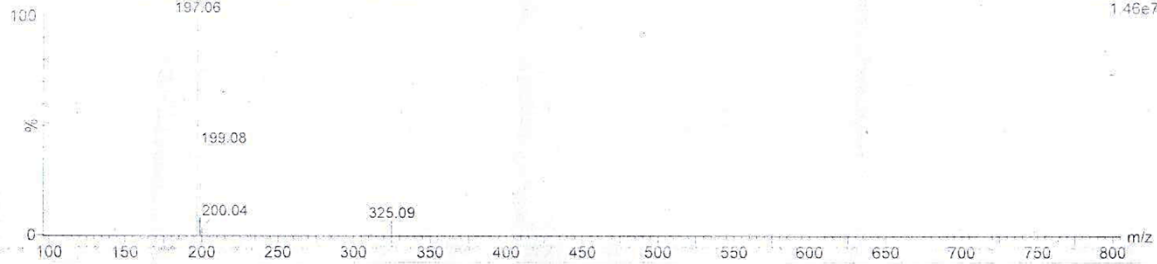

Mass Spectra of (E)-1-(4-phenylbenzylidene)-4-(2,4-dichlorophenyl)thiosemicarbazide

XEVO-TQD#QCA1591

06-Sep-2022 11:09:42

RK-A00781-107 - Sm (Mn, 2x3)

3: Diode Array  
Range: 7.699e+1

| Time | Height  | Area       | Area% |
|------|---------|------------|-------|
| 2.23 | 959300  | 32406.47   | 0.96  |
| 2.45 | 1884921 | 43425.61   | 1.29  |
| 3.45 | 1120224 | 34066.48   | 1.01  |
| 3.75 | 7665520 | 3260538.50 | 96.74 |

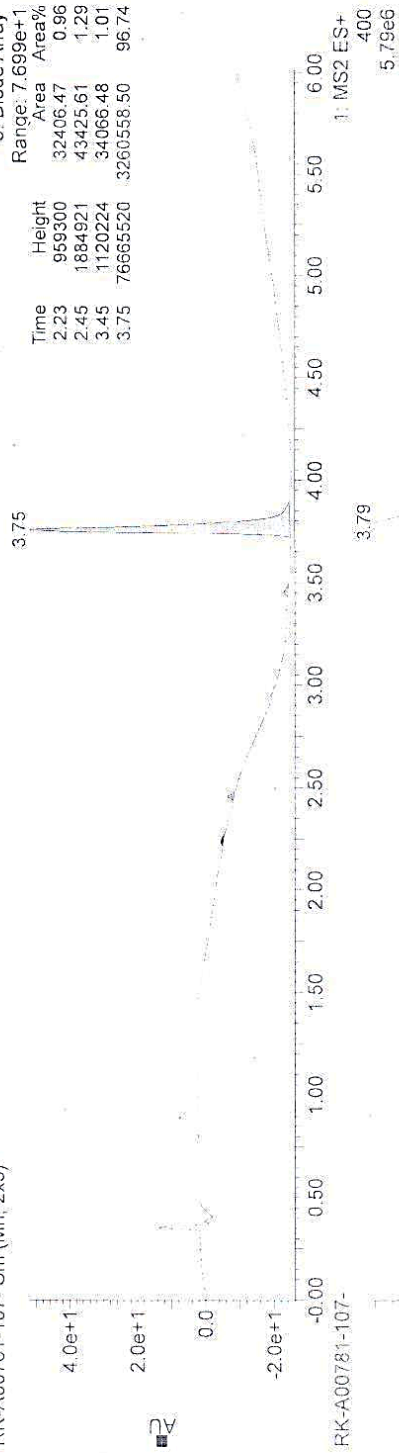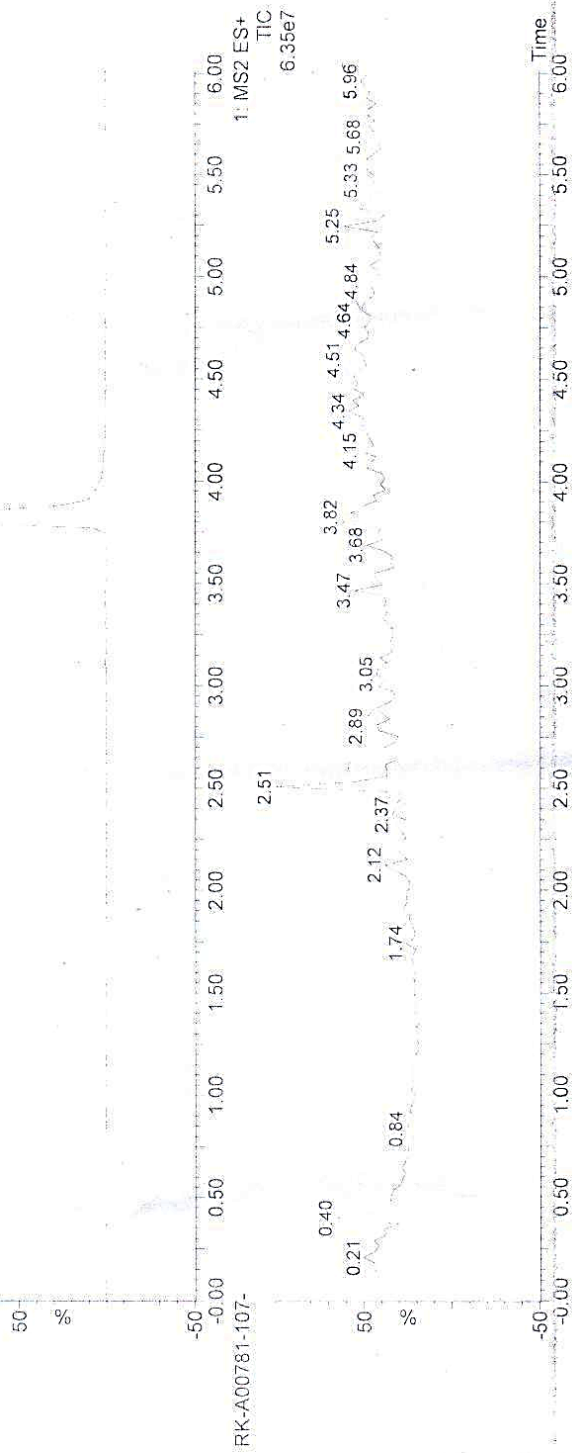

Mass Spectra of (E)-1-(4-phenylbenzylidene)-4-(2,4-dichlorophenyl)thiosemicarbazide

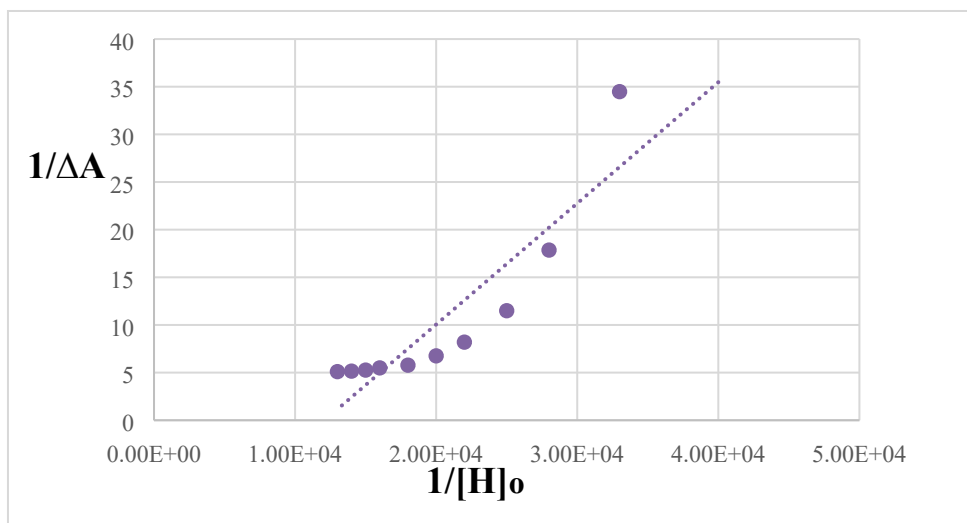

Binding constant of TSC1 with  $Co^{2+}$

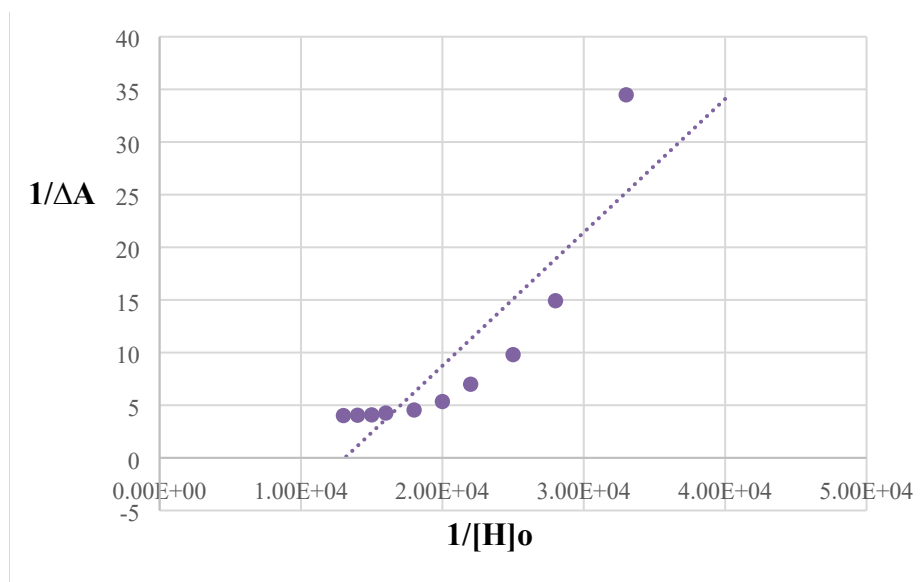

Binding constant TSC1 with  $Ni^{2+}$

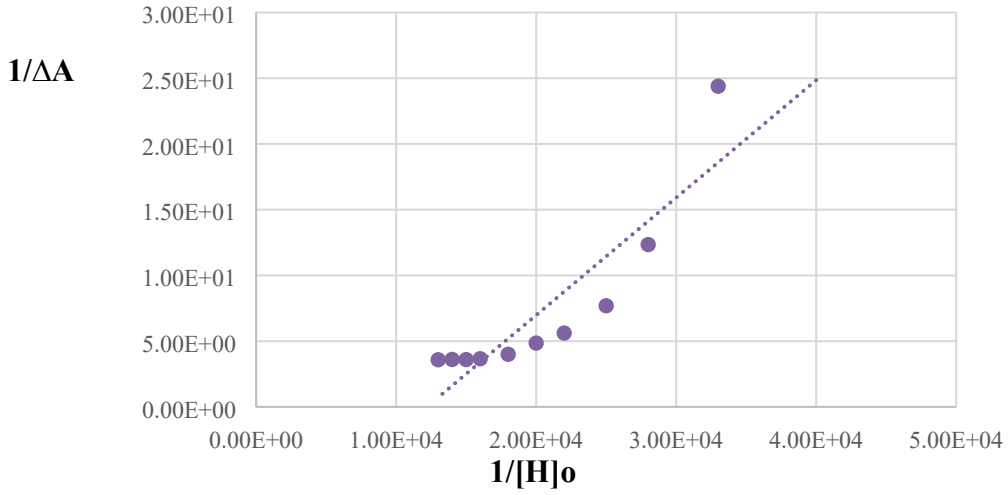

Binding constant TSC1 with  $Cu^{2+}$

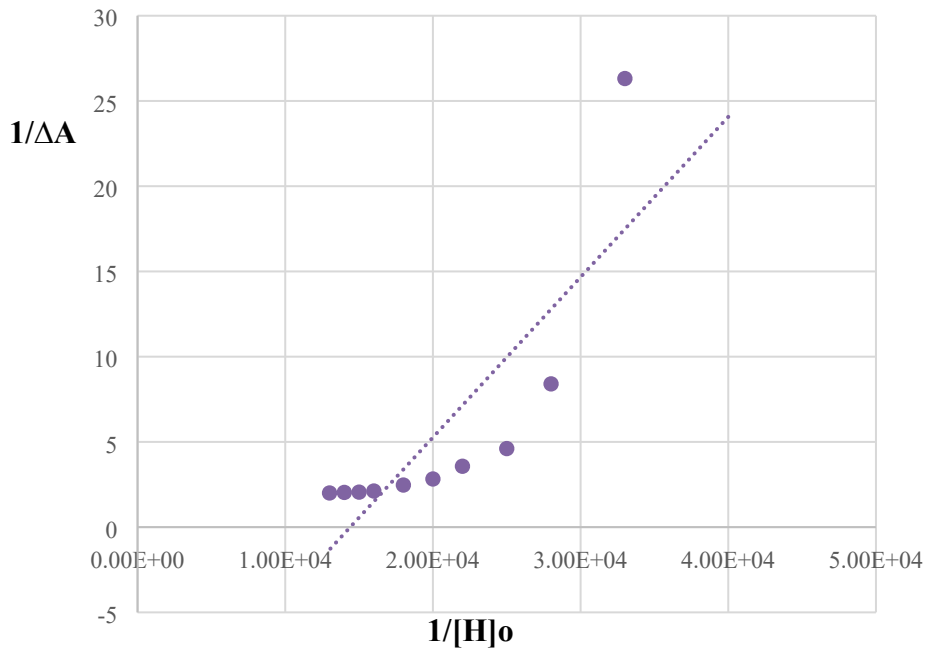

Binding constant TSC1 with  $Zn^{2+}$

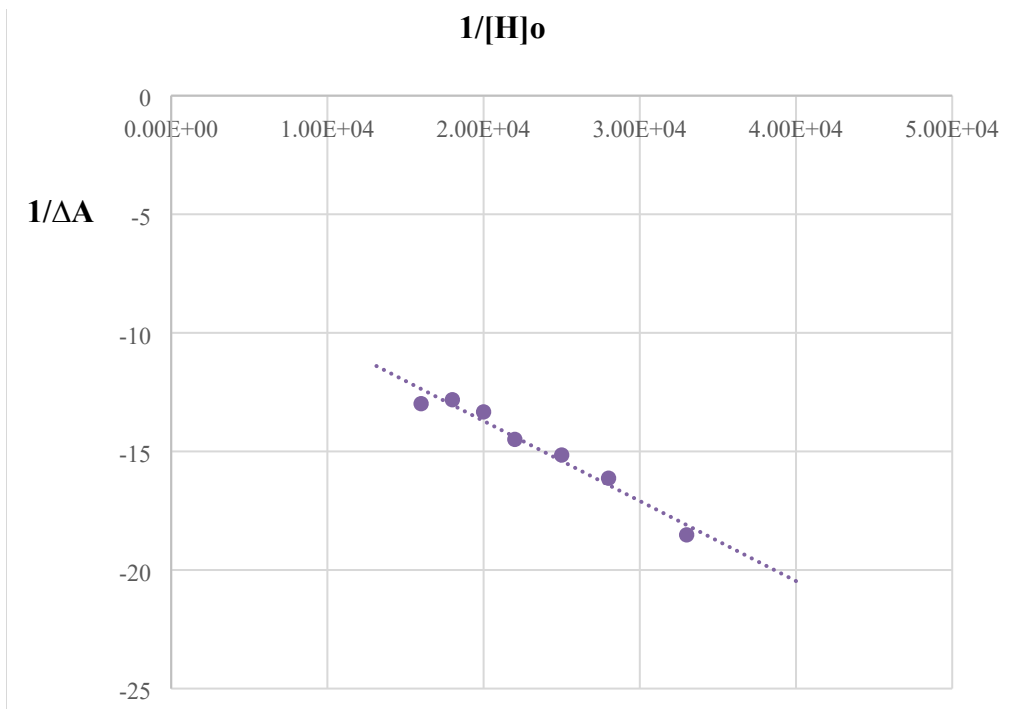

Binding constant of TSC2 with Hg<sup>2+</sup>

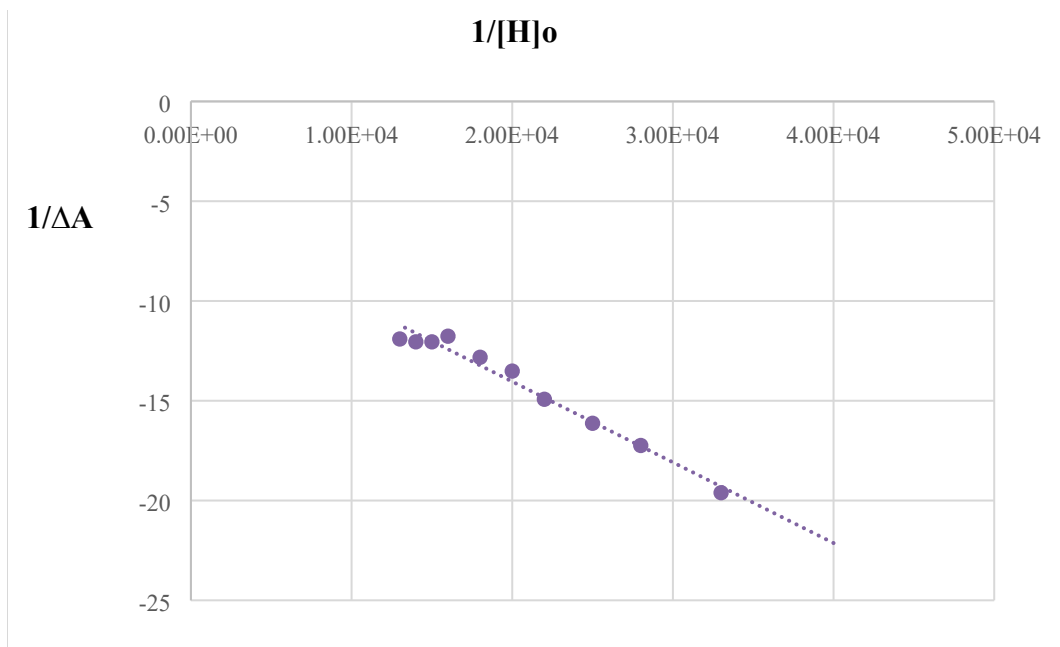

Binding constant of TSC2 with Sn<sup>2+</sup>

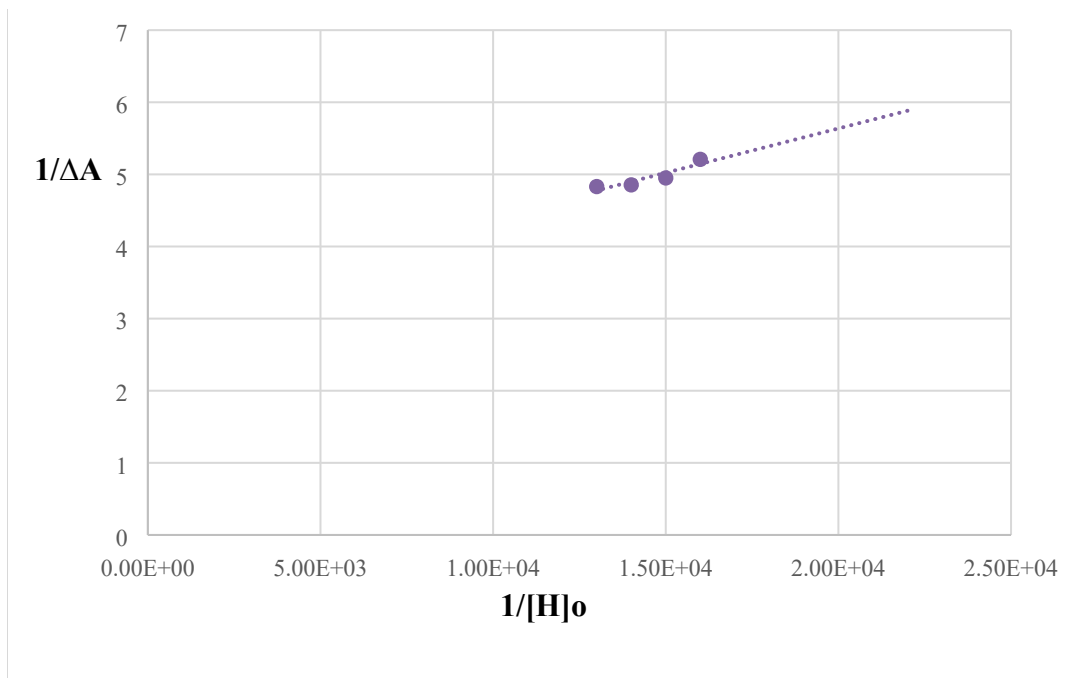

Binding constant of TSC3 with  $Mn^{2+}$
